# Supplementary material
Source: Springer Nature journal article supplement (https://www.springermedizin.de/resource/supplementary/12936_2014_3337_MOESM5_ESM.pdf/9545690)

% of children with axillary temp.  $\geq 37.5$  °C

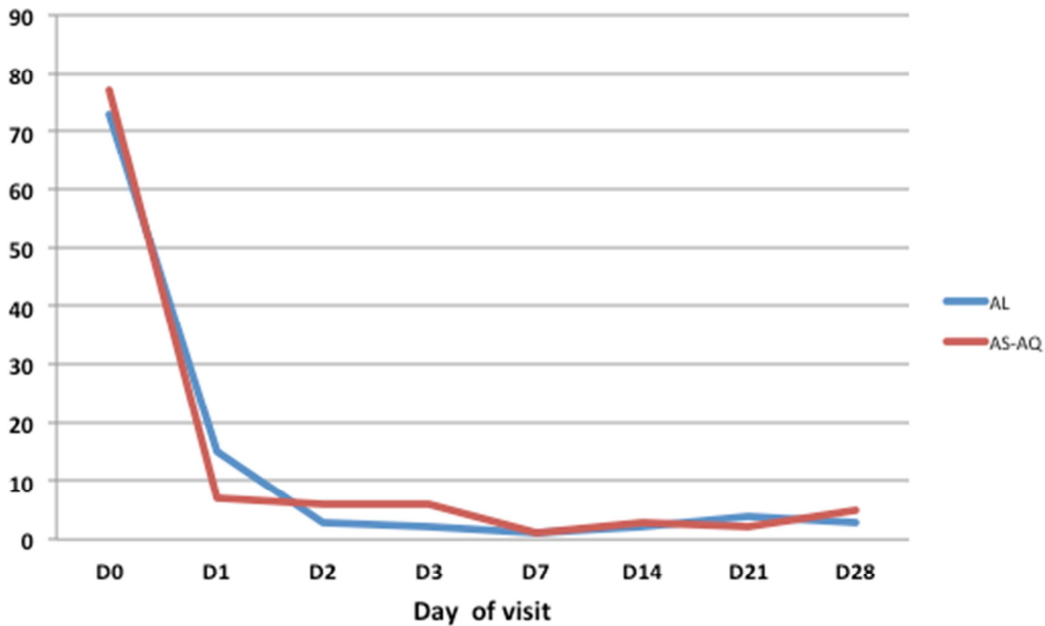

Supplement: MOESM5 [file 9545690]
